# Supplementary material for: TKI type switching overcomes ROS1 L2086F in ROS1 fusion-positive cancers
Source: PubMed Central journal article supplement — NPJ Precis Oncol. 2024 Aug 8;8:175. doi: 10.1038/s41698-024-00663-1 (PMC11310217; doi:10.1038/s41698-024-00663-1), 2024-08-08
Supplement: 41698_2024_663_MOESM1_ESM.pdf [file 41698_2024_663_MOESM1_ESM.pdf]

## **Supplementary Information**

### **TKI Type Switching Overcomes ROS1 L2086F in ROS1 Fusion-Positive Cancers**

Rajat Thawani<sup>1#</sup>, Matteo Repetto<sup>2#</sup>, Clare Keddy<sup>3</sup>, Katelyn Nicholson<sup>3</sup>, Kristen Jones<sup>3</sup>, Kevin Nusser<sup>3</sup>, Catherine Z. Beach<sup>3</sup>, Guilherme Harada<sup>2</sup>, Alexander Drilon<sup>2,4\*</sup>, Monika A. Davare<sup>3,5\*</sup>

# Supplementary Figure 1

## Ba/F3 CD74-ROS1

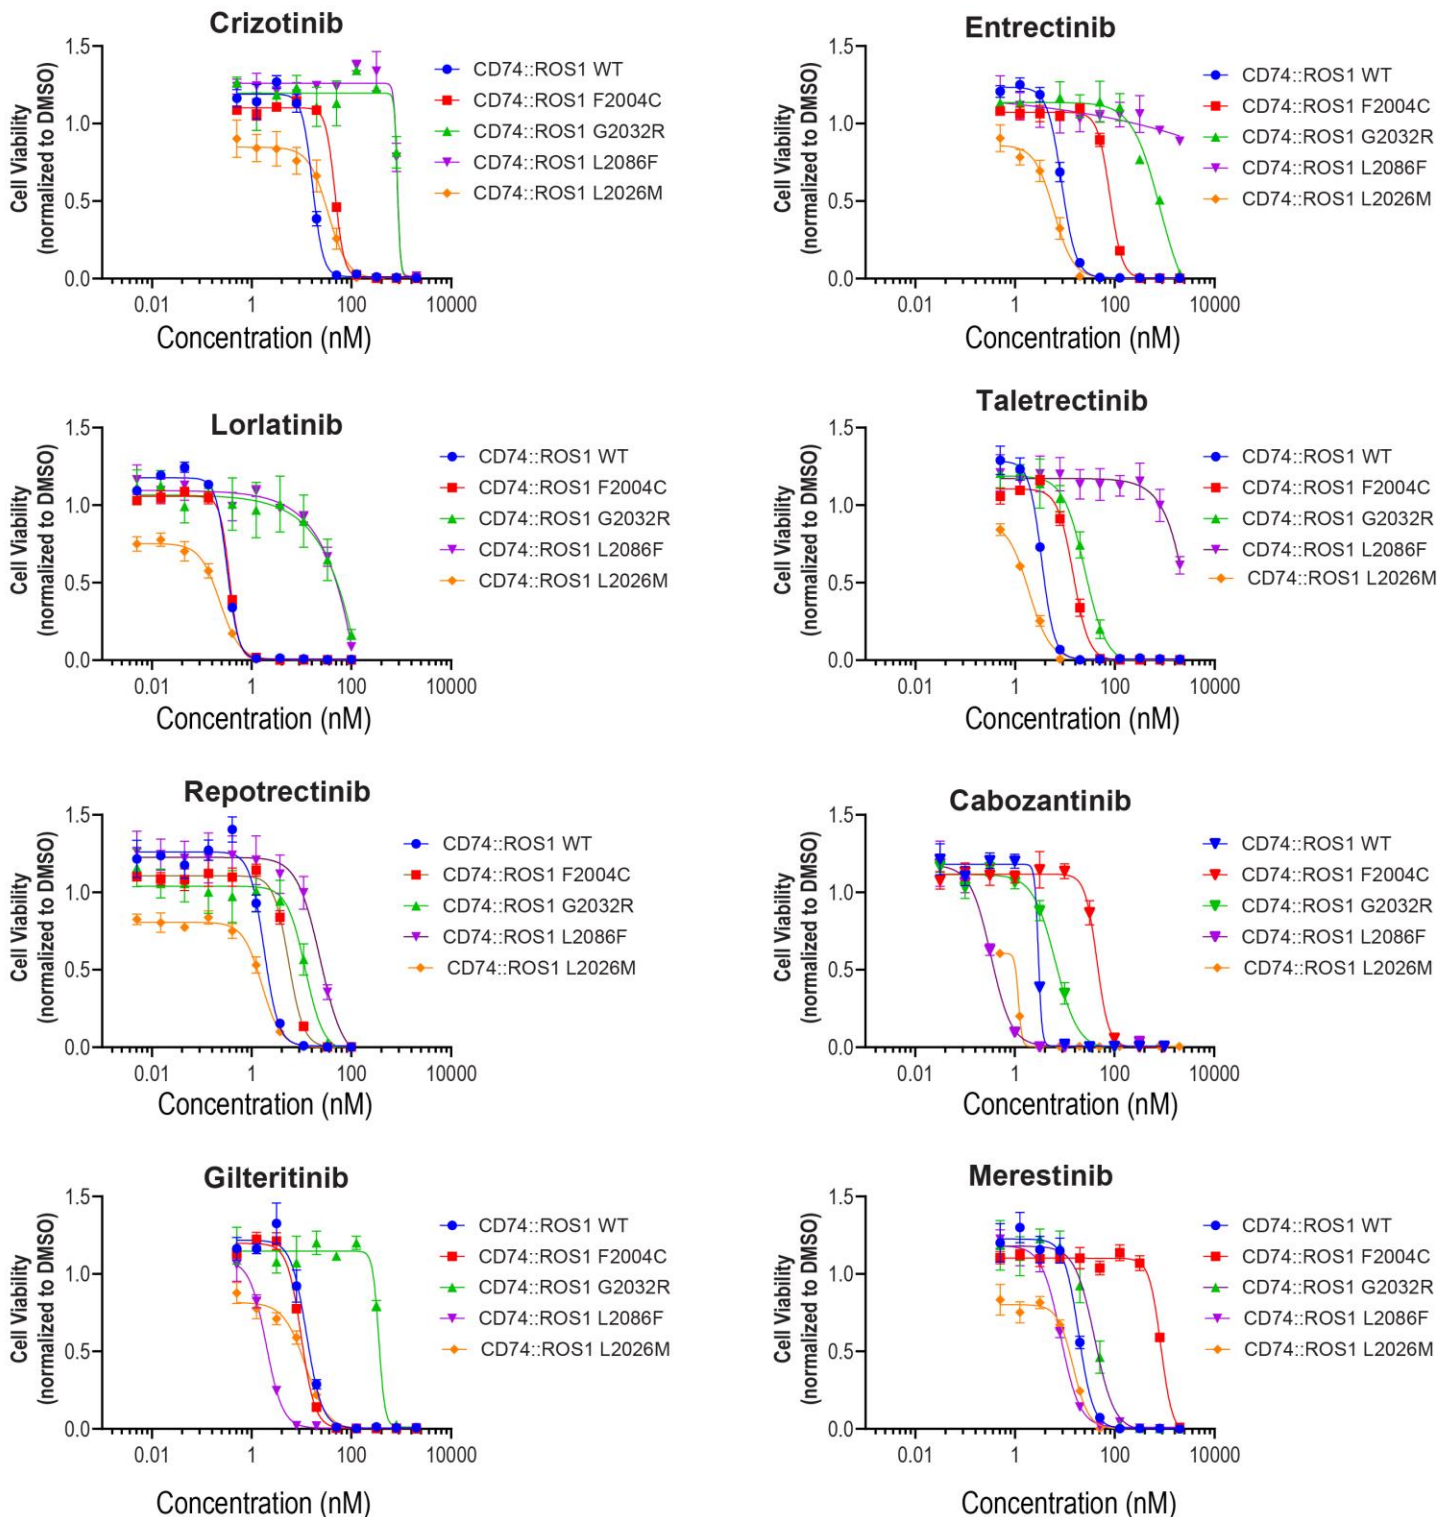

**Supplementary Figure 1. Dose response curves characterizing tyrosine kinase inhibitor sensitivity of ROS1 wild-type (WT) and mutant cell lines.** Dose response cell viability assay data of Ba/F3 CD74-ROS1 WT and indicated mutant cells lines after 72-hour exposure with varying concentrations of crizotinib, entrectinib, taletrectinib, lorlatinib, repotrectinib, cabozantinib, merestinib, and gilteritinib as normalized to vehicle-treated cells. Where indicated, mean and SEM is shown from three technical replicates.

## Supplementary Figure 2

### Ba/F3 CD74-ROS1 mutant dose response curves

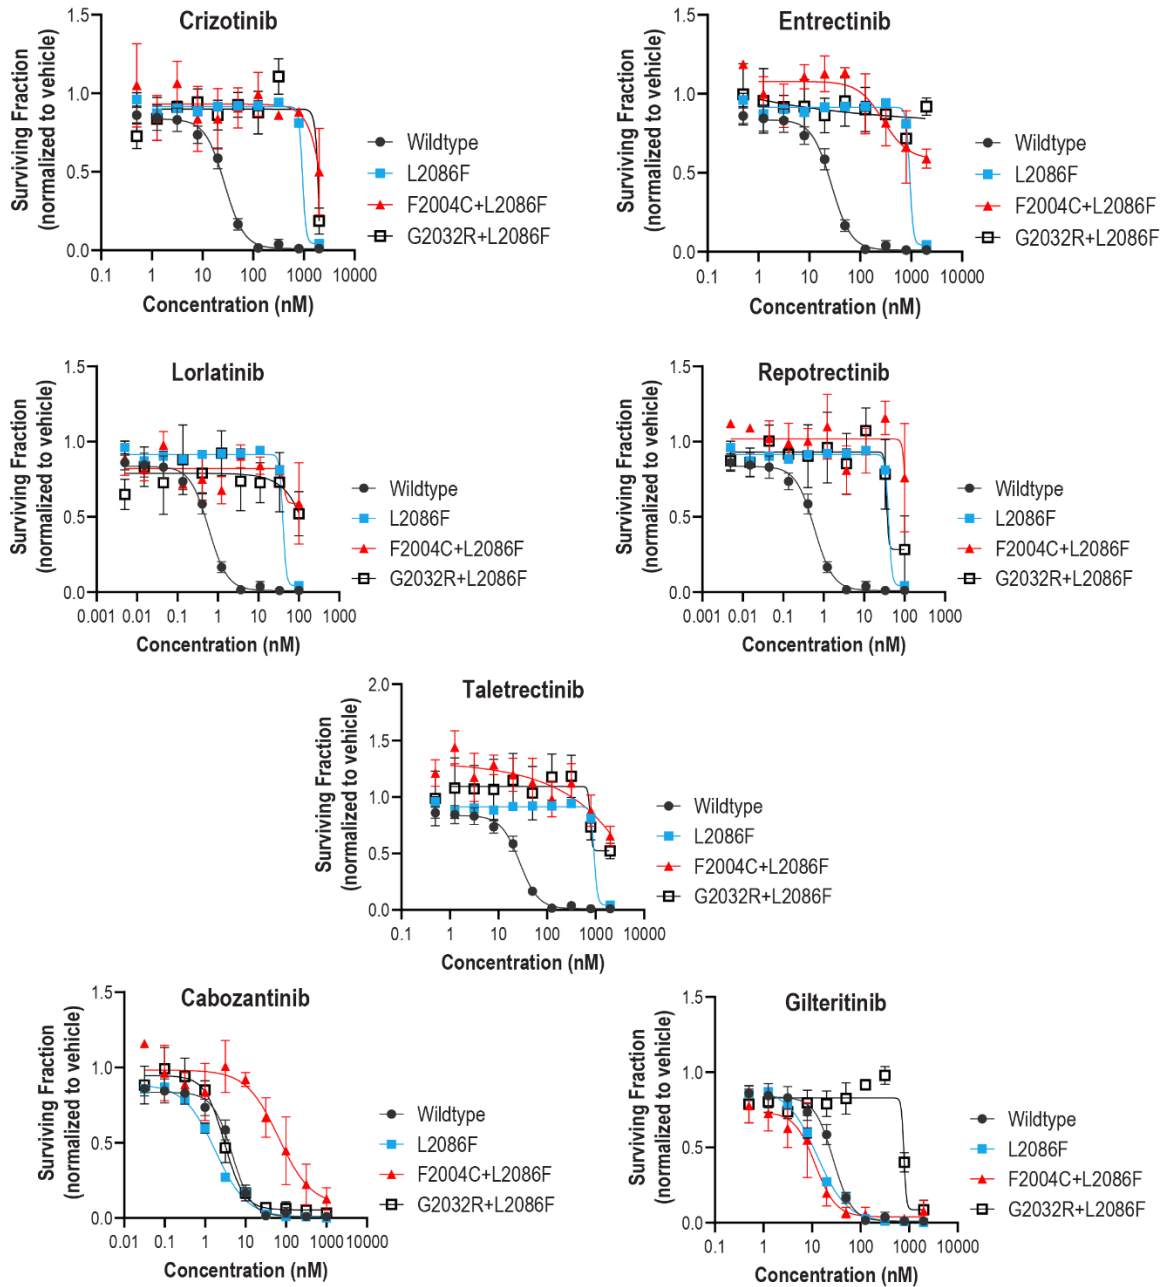

**Supplementary Figure 2. Dose response cell viability assay data showing tyrosine kinase inhibitor sensitivity of ROS1 wild-type (WT), L2086F and compound mutation cell lines.** Dose response cell viability assay data of Ba/F3 *CD74-ROS1* wildtype, L2086F, F2004C+L2086F and G2032R+L2086F cell lines after 72-hour exposure with varying concentrations of crizotinib, entrectinib, taletrectinib, lorlatinib, repotrectinib, cabozantinib, merestinib, and gilteritinib as normalized to vehicle-treated cells. Where indicated, mean and SEM is shown from three technical replicates.

### Supplementary Figure 3

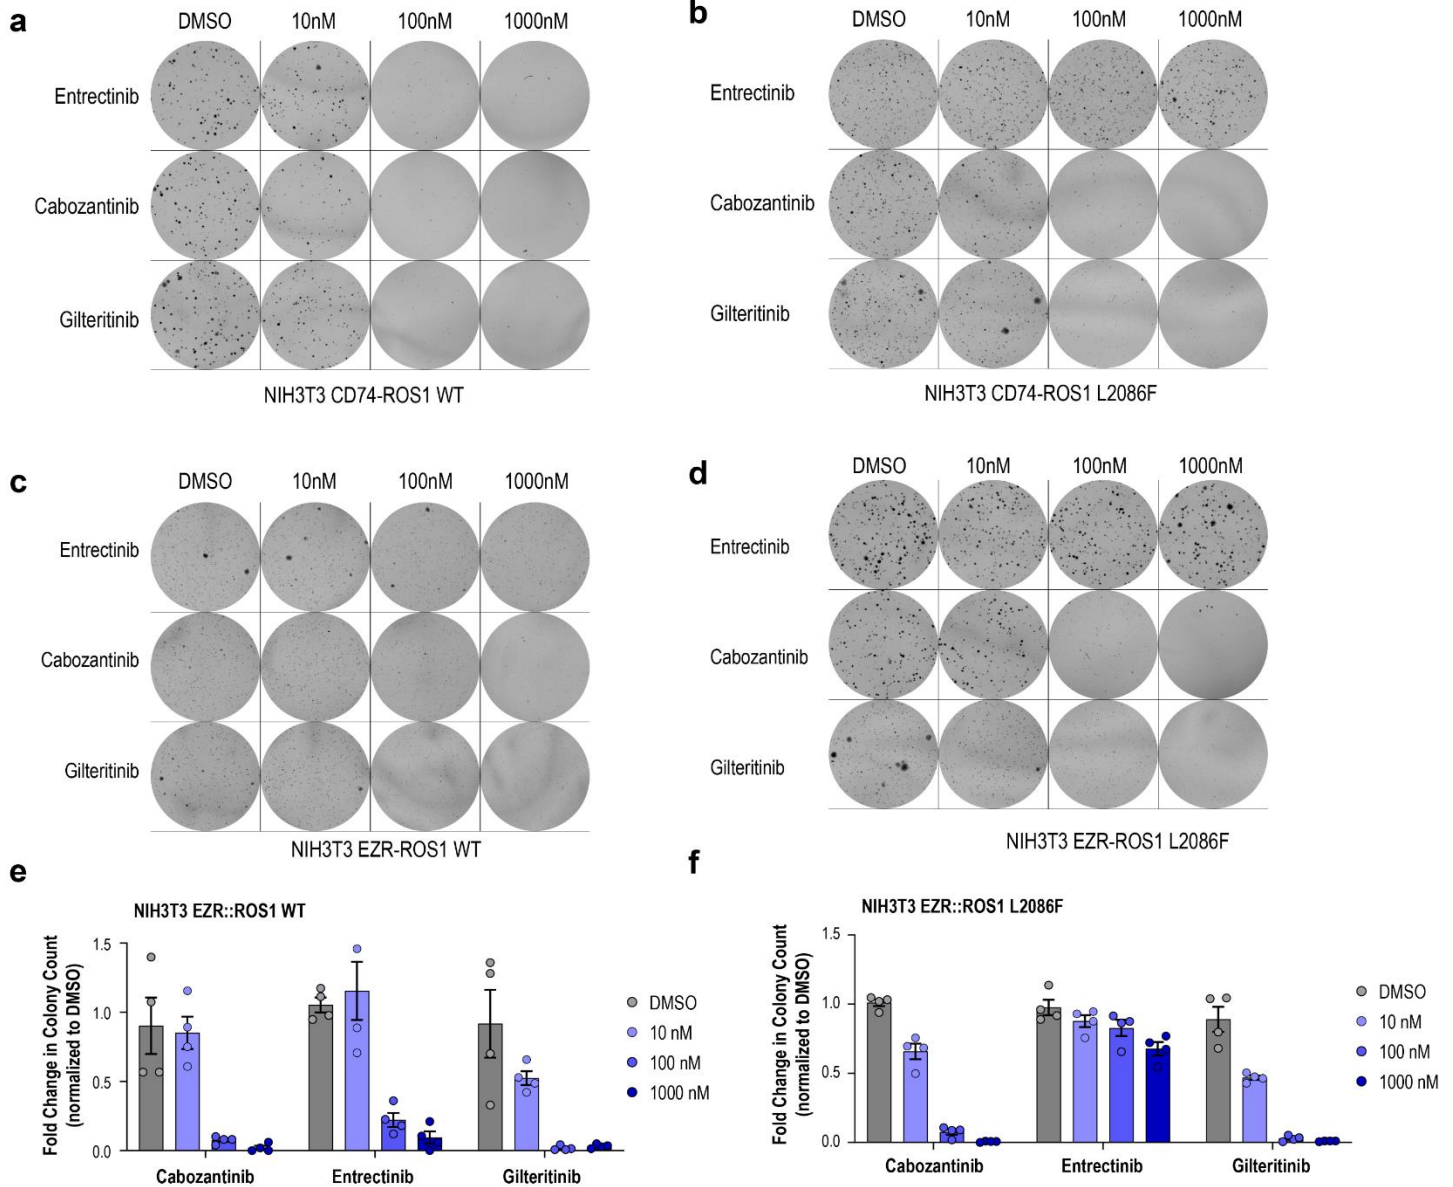

**Supplementary Figure 3. Soft agar colony formation assays using NIH3T3 *EZR-ROS1* wild-type (WT) and L2086F cells.** a-d. Representative images from colony formation soft agar assays using NIH3T3 CD74::ROS1 and EZR::ROS1 WT and L2086F cells in indicated concentrations of inhibitor. e-f. Colony count normalized to paired dimethyl sulfoxide (DMSO) conditions for indicated tyrosine kinase inhibitor treatment conditions from anchorage-independent soft agar assays using NIH3T3 EZR::ROS1 WT or L2086F cell lines. Data from n=4 wells per condition with mean and SEM shown.

## Supplementary Figure 4

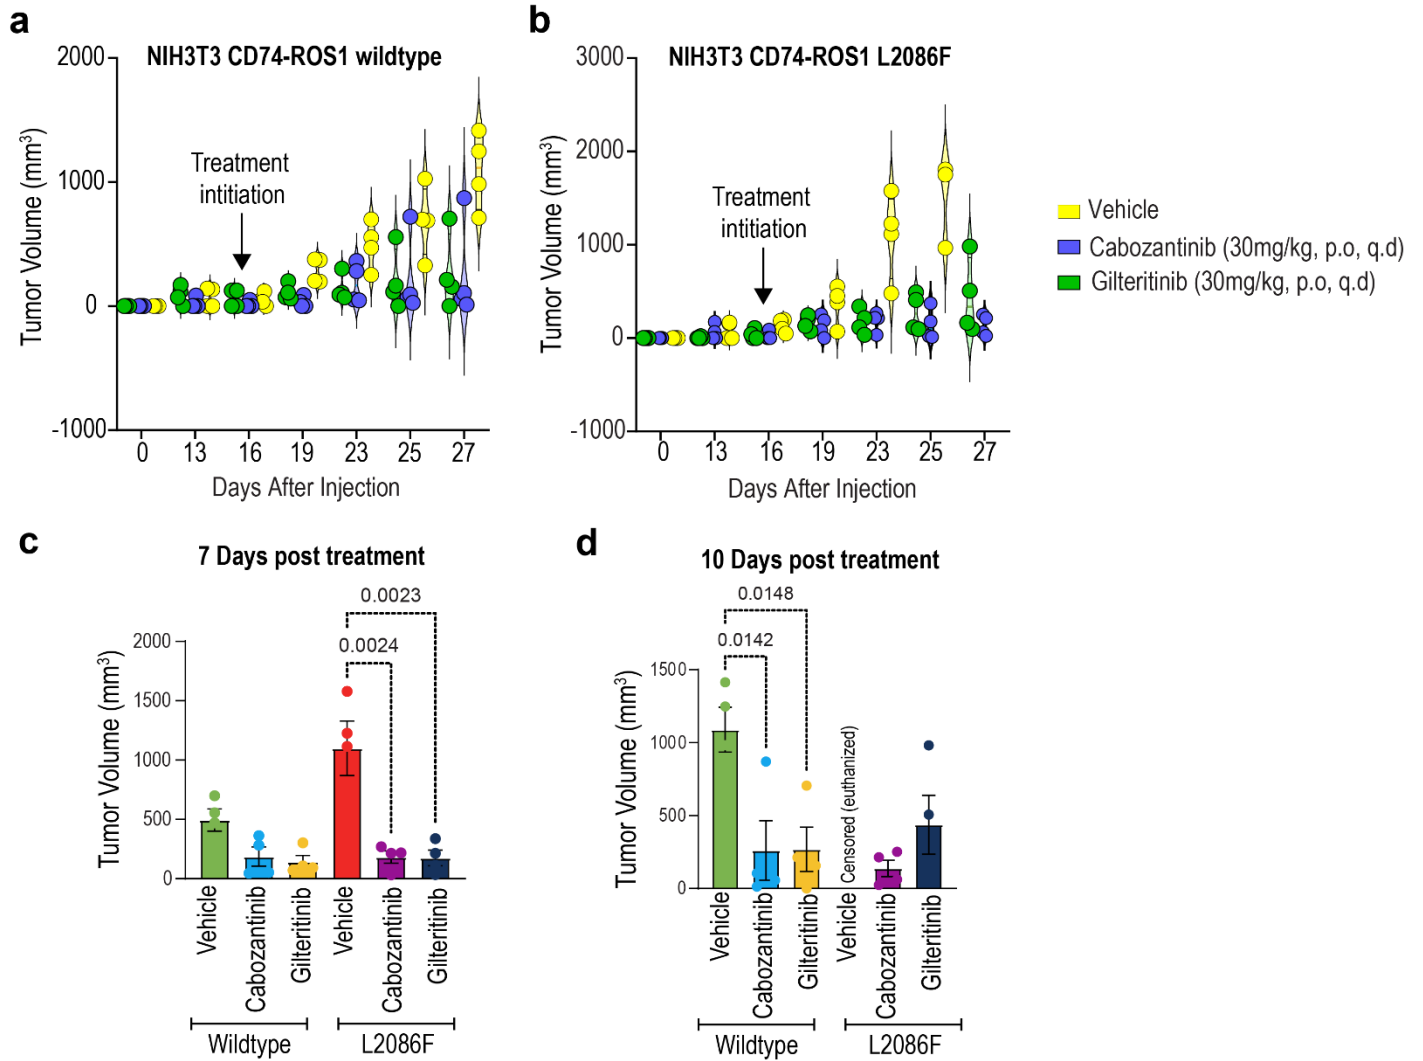

**Supplementary Figure 4. In vivo antitumor efficacy of cabozantinib and gilteritinib.** Time course of tumor growth of allografted NIH3T3 *CD74-ROS1* wild-type (**a**) and 2086F (**b**) subcutaneous tumors treated with cabozantinib and gilteritinib. N = 4 mice per treatment group. Arrow indicates treatment initiation. Tumor volumes at (**c**) day 7 post treatment (day 23 in experiment) and (**d**) day 10/11 post treatment (day 26/27) of treatment are shown. Mean  $\pm$  SEM are presented in the graphs. P values determined using one way ANOVA with Dunnett's multiple comparison test are shown in case of significance.

## Supplementary Figure 5

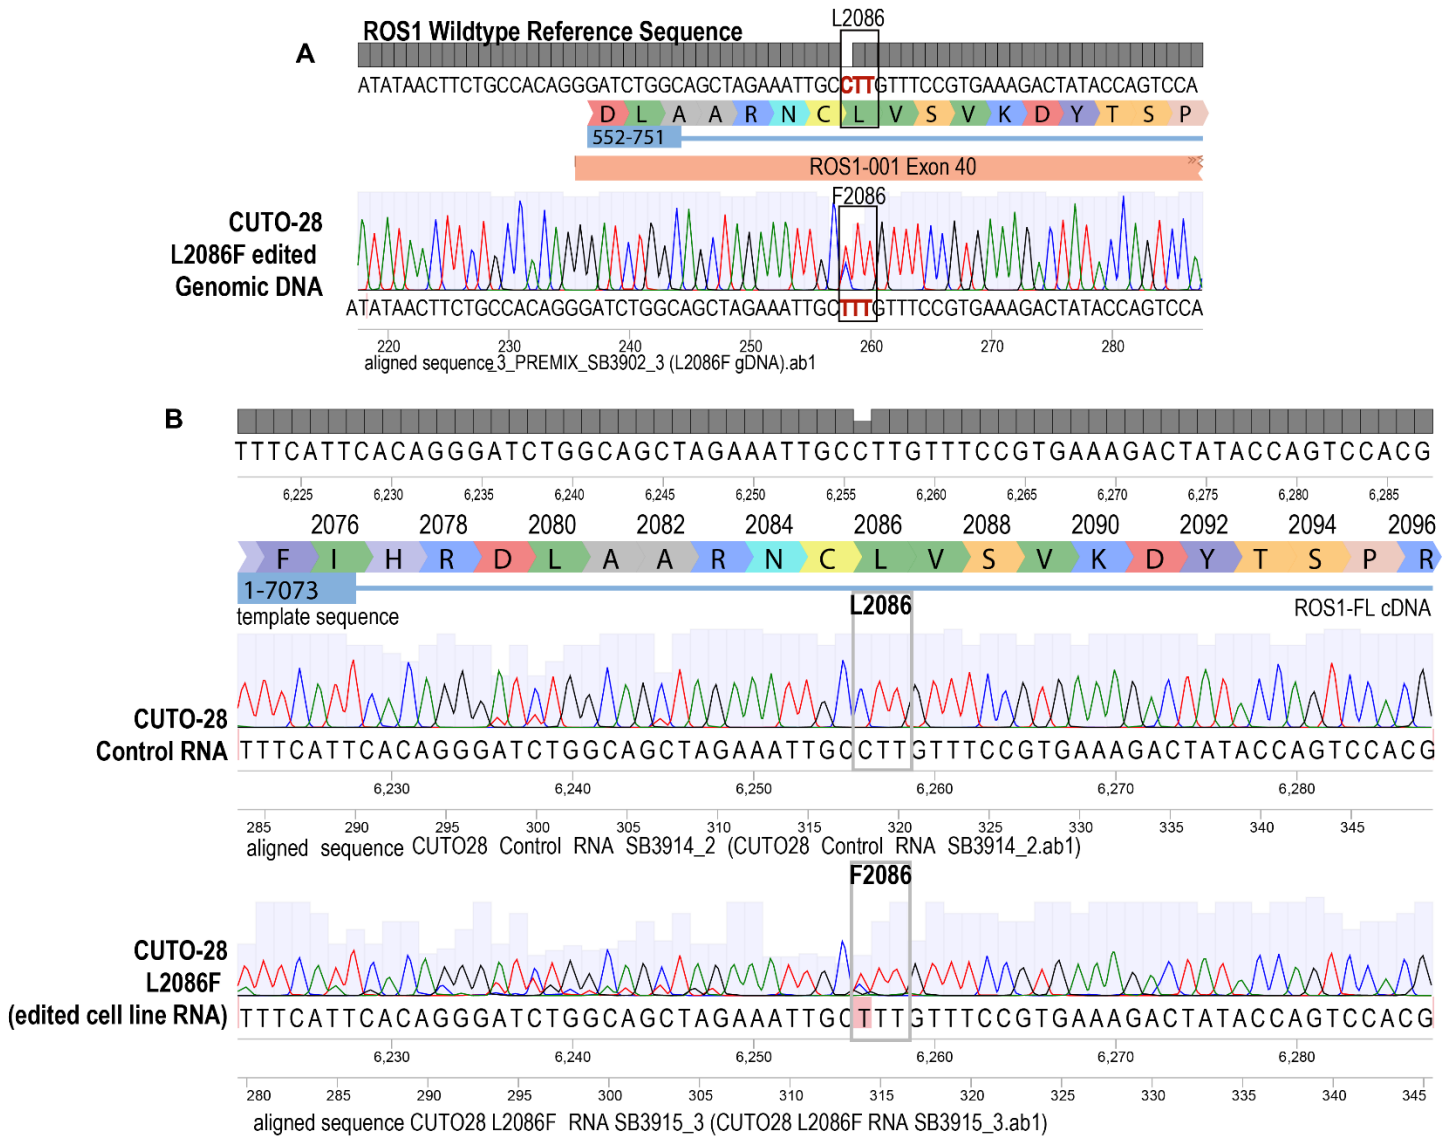

**Supplementary Figure 5. Validation of genome edited endogenous L2086F mutation in the CUTO-28 L2086F cell line.** Sanger sequencing on amplicons generated from CUTO-28 L2086F cell line gDNA (a) and cDNA (b) confirm the heterozygous L2086F mutation in this gene edited cell line.

## Supplementary Figure 6

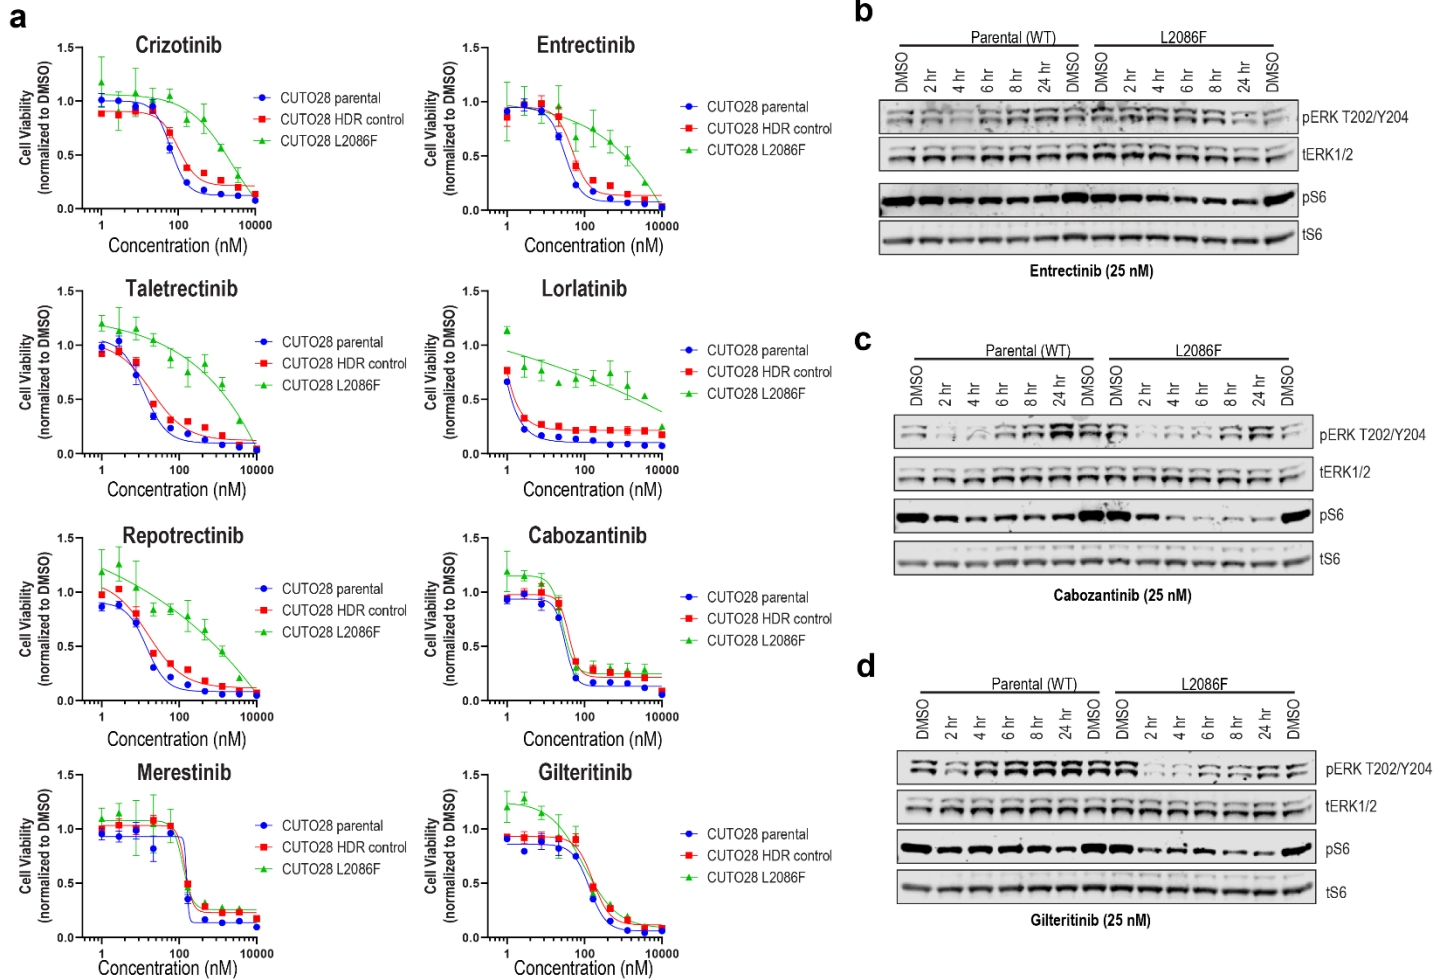

**Supplementary Figure 6. Dose response curves characterizing tyrosine kinase inhibitor sensitivity of CUTO-28 Parental, CUTO-28 Control HDR edited and CUTO-28 L2086F mutant cell lines. a.** Cell viability of indicated cells lines after 72-hour exposure with varying concentrations of crizotinib, entrectinib, taletrectinib, lorlatinib, repotrectinib, cabozantinib, merestinib, and gilteritinib as normalized to vehicle-treated cells. Where indicated, mean and SEM is shown from three technical replicates. **b-d.** Immunoblot analysis of phosphorylated and total MAPK (ERK1/2) and protein S6 from lysates generated from CUTO-28 parental and TPM3-ROS1 L2086F cells that were treated for 2, 4, 6, 8, and 24 hours with 25 nM entrectinib, cabozantinib and gilteritinib, as indicated.

## Supplementary Figure 7

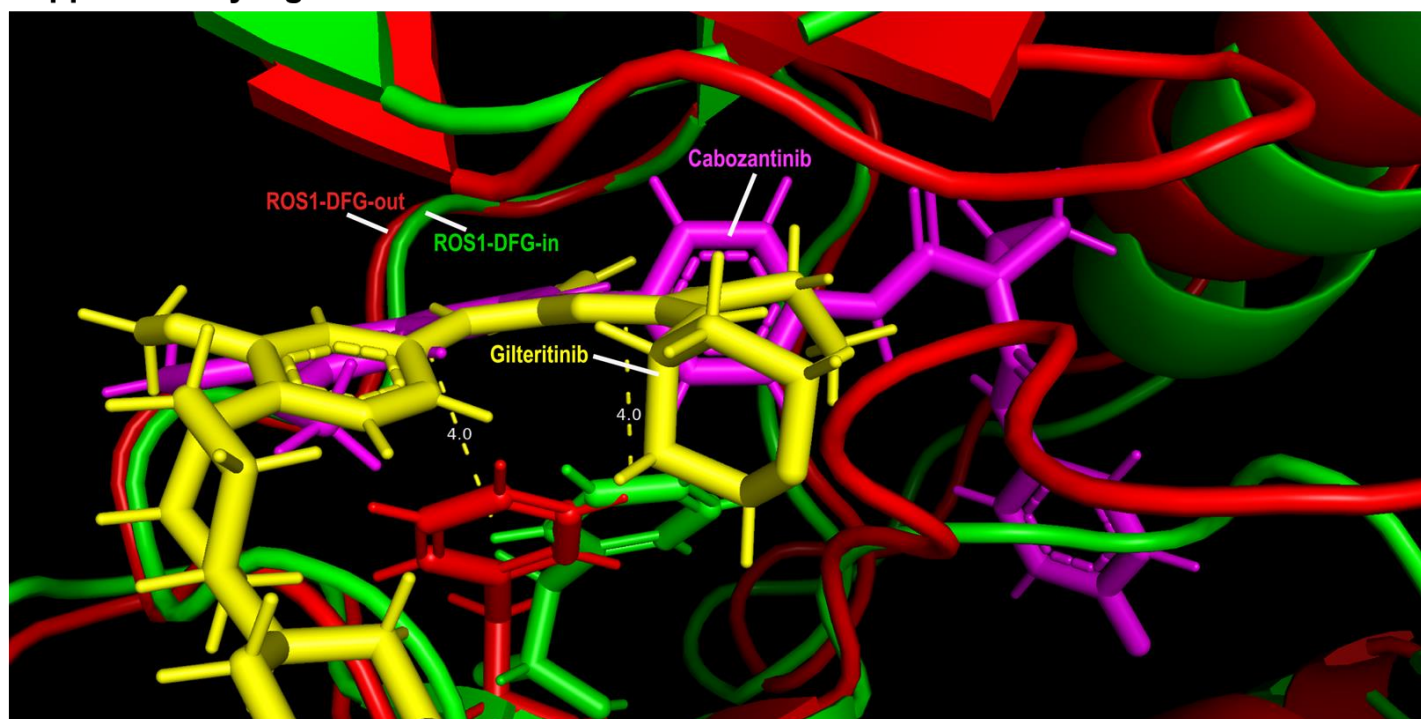

### Supplementary Figure 7. Distances between ROS1 L2086F and aromatic systems in predicted binding poses of cabozantinib and gilteritinib.

ROS1 DFG-in (green), gilteritinib (yellow), ROS1 DFG-out (red), cabozantinib (purple), measurements are shown from the center of the phenyl group of ROS1 L2086F and the pyrazinamide moiety of gilteritinib and the quinoline moiety of cabozantinib.



## Supplementary Figure 8

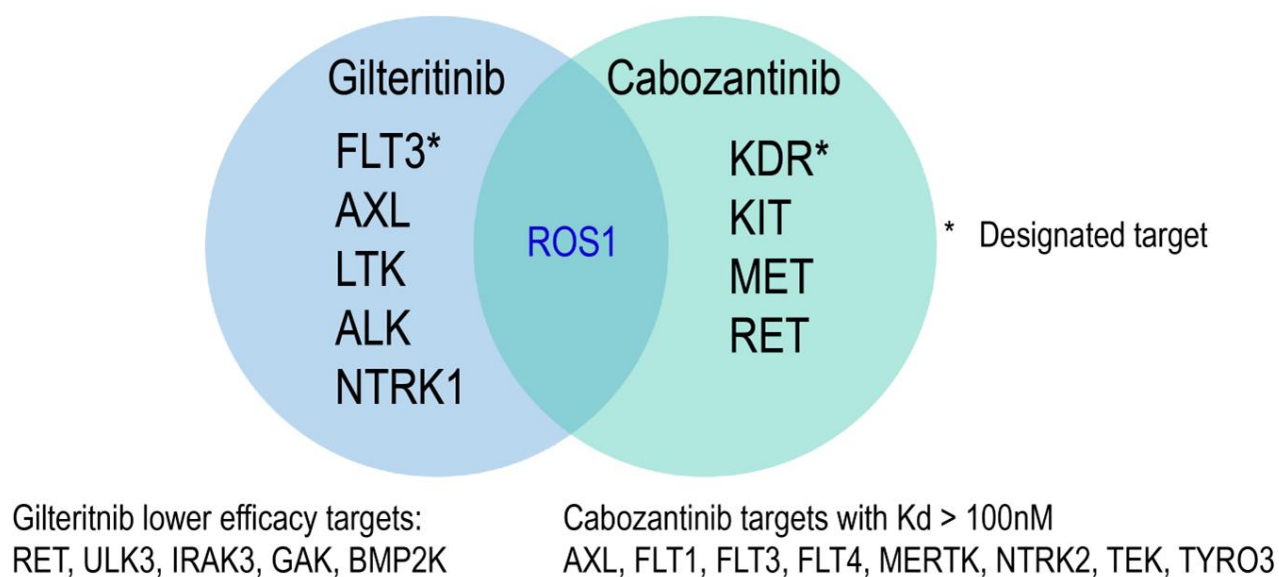

### Supplementary Figure 8. Spectrum of kinase inhibition by gilteritinib and cabozantinib.

The respective kinase inhibition profiles were examined using the Harvard Medical School's Library of Integrated Network-based Cellular Signatures (LINCS) Small Molecule profiling database (<https://lincs.hms.harvard.edu/db/sm/10194-106/>) for cabozantinib, and data from the publication by Klaeger et al.<sup>38</sup> for gilteritinib's inhibition profile.

## Supplementary Figure 9

- a** Gilteritinib PK data from human studies relative to cell based  $IC_{50}$  with CUTO-28 cells  
Data from FDA recommended human gilteritinib dose - 120mg/PO/QD

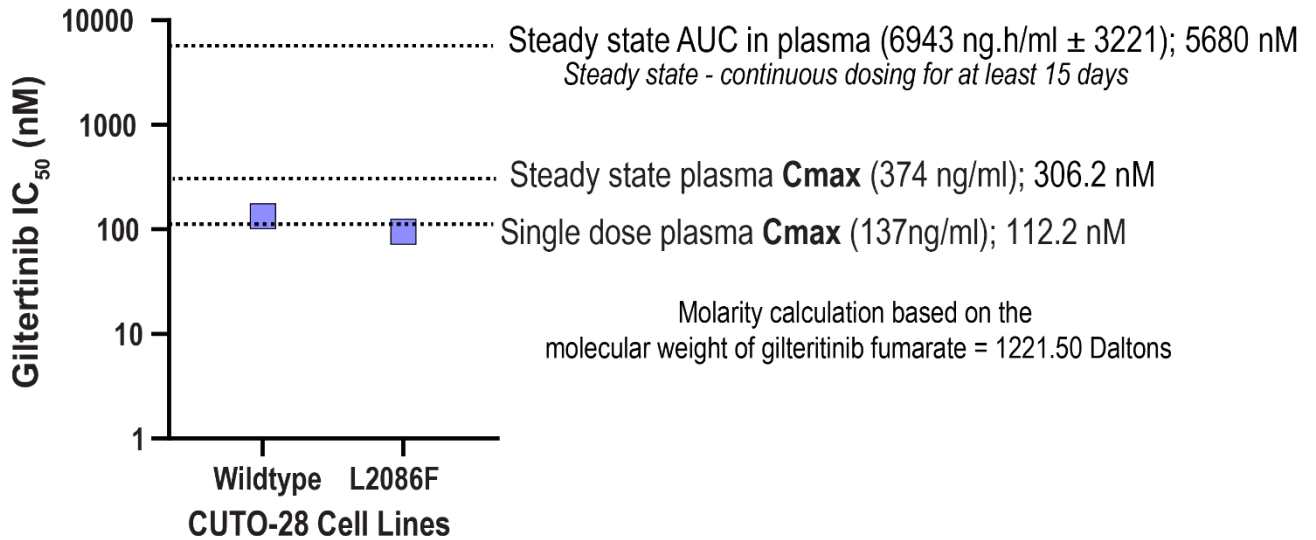

- b** Cabozantinib PK data from human studies relative to cell based  $IC_{50}$  with CUTO-28 cells  
Data from FDA recommended human cabozantinib dose - 60 mg/PO/QD compared to 40 and 20 mg.

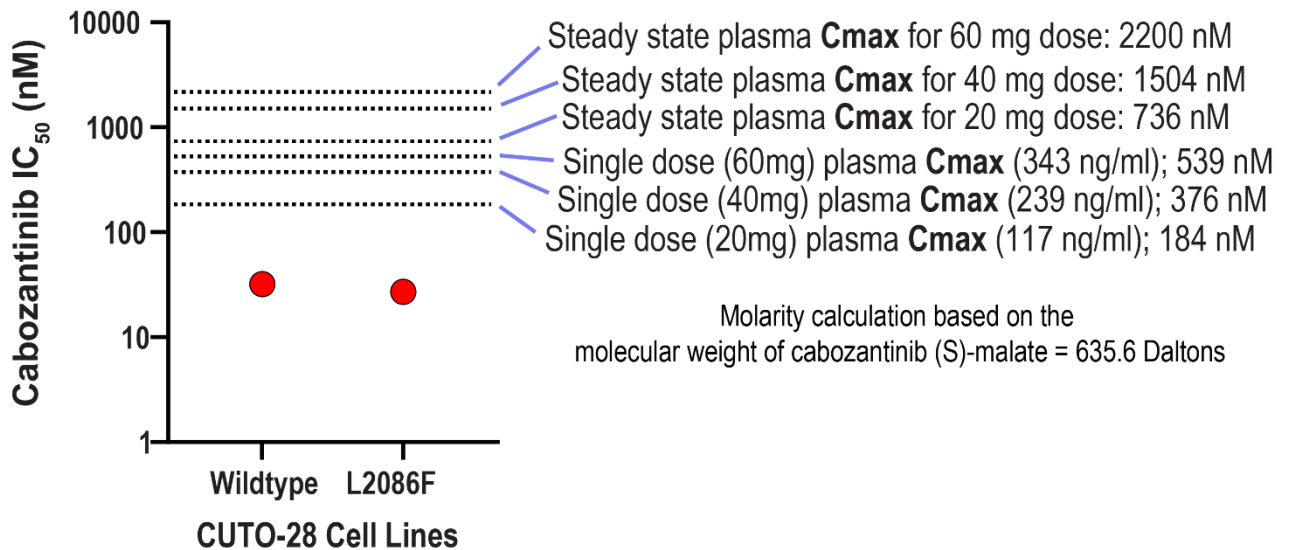

**Supplementary Figure 9. Pharmacokinetic (PK) profiles of gilteritinib and cabozantinib juxtaposed with cell-based  $IC_{50}$  for CUTO-28 wildtype and L2086F mutant cells.** **a.** Gilteritinib (Xospata™) PK profile was determined from FDA prescribing information insert ([https://www.accessdata.fda.gov/drugsatfda\\_docs/label/2019/211349s001lbl.pdf](https://www.accessdata.fda.gov/drugsatfda_docs/label/2019/211349s001lbl.pdf)), **b.** cabozantinib PK data were from publication by Ngyuyen et al<sup>32</sup>. In both cases the concentrations in molarity units are calculated based on clinically reported ng/ml unit PK data and molecular weights of respective human formulated drugs.

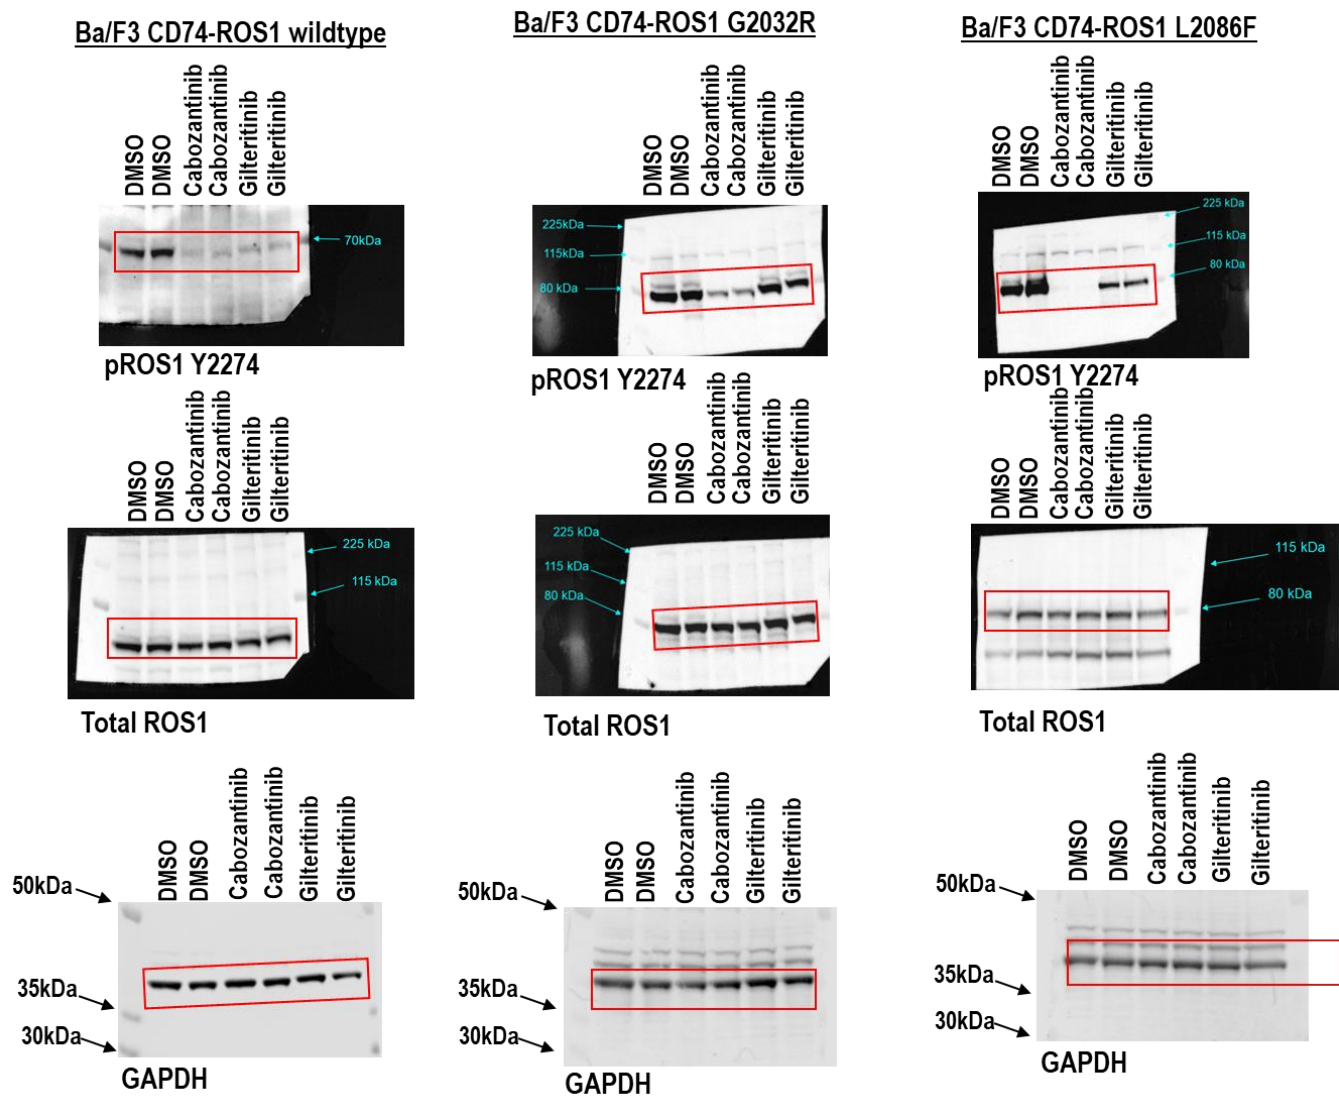

**Supplementary Figure 10a. a. Uncropped western blot chemiluminescent images from TKI-treated treated Ba/F3 cell lysate blotting shown in Figure 1c. Note:** The images shown below are merged composites of the chemiluminescent image and the colorimetric membrane image. These are shown as composites to clearly delineate the outline of the blot and depict protein ladders. When imaging the GAPDH blot, the colorimetric image was not saved. ROS1 antibody blots were developed using chemiluminescent substrate. GAPDH blots were developed using LICOR imager.

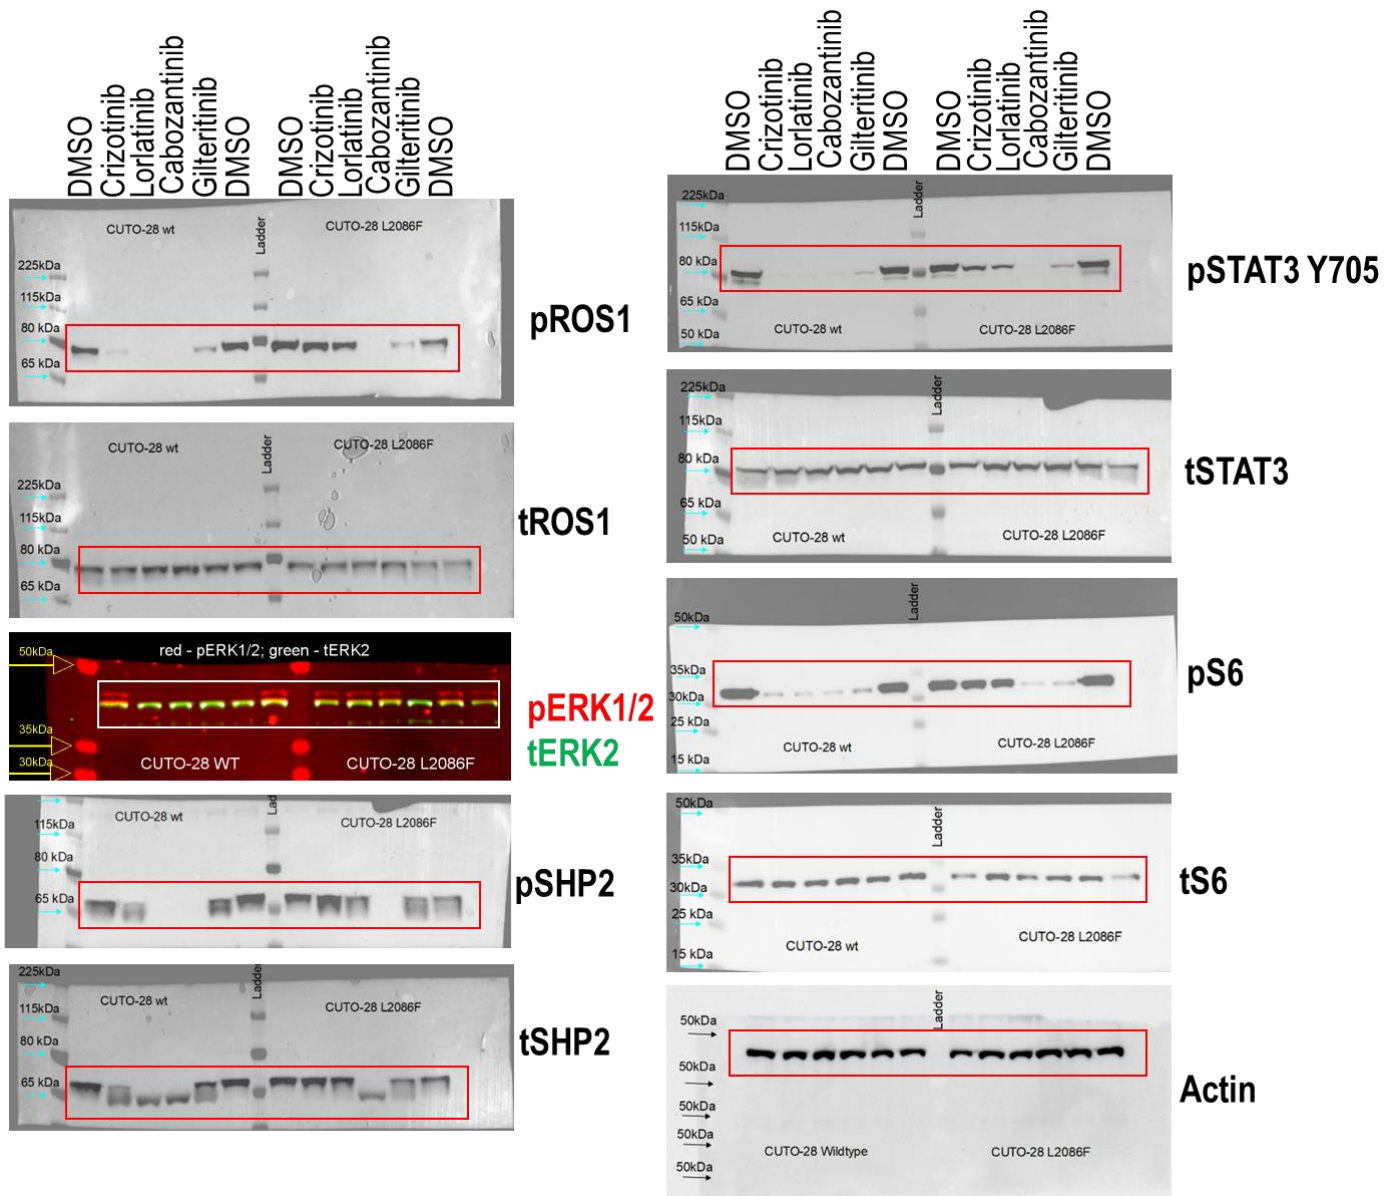

**Supplementary Figure 10b. Uncropped western blot chemiluminescent images from TKI-treated CUTO-28 Parental and CUTO-28 L2086F cell lysate blotting in Figure 2c.** The images shown below are merged composites of the chemiluminescent image and the colorimetric membrane image. These are shown as composites to clearly delineate the outline of the blot and depict protein ladders. Except of phospho-ERK1/2 and total ERK2, all blots were developed using chemiluminescent substrate. ERK signaling (phospho-ERK1/2 and total ERK2) were multiplexed via detection with Anti-Rabbit-Alexa680 and Anti-Mouse-Alexa790 secondary antibodies. Figure 2 shows black and white converted images. Composite red/green image from LI-COR imaging is shown below.

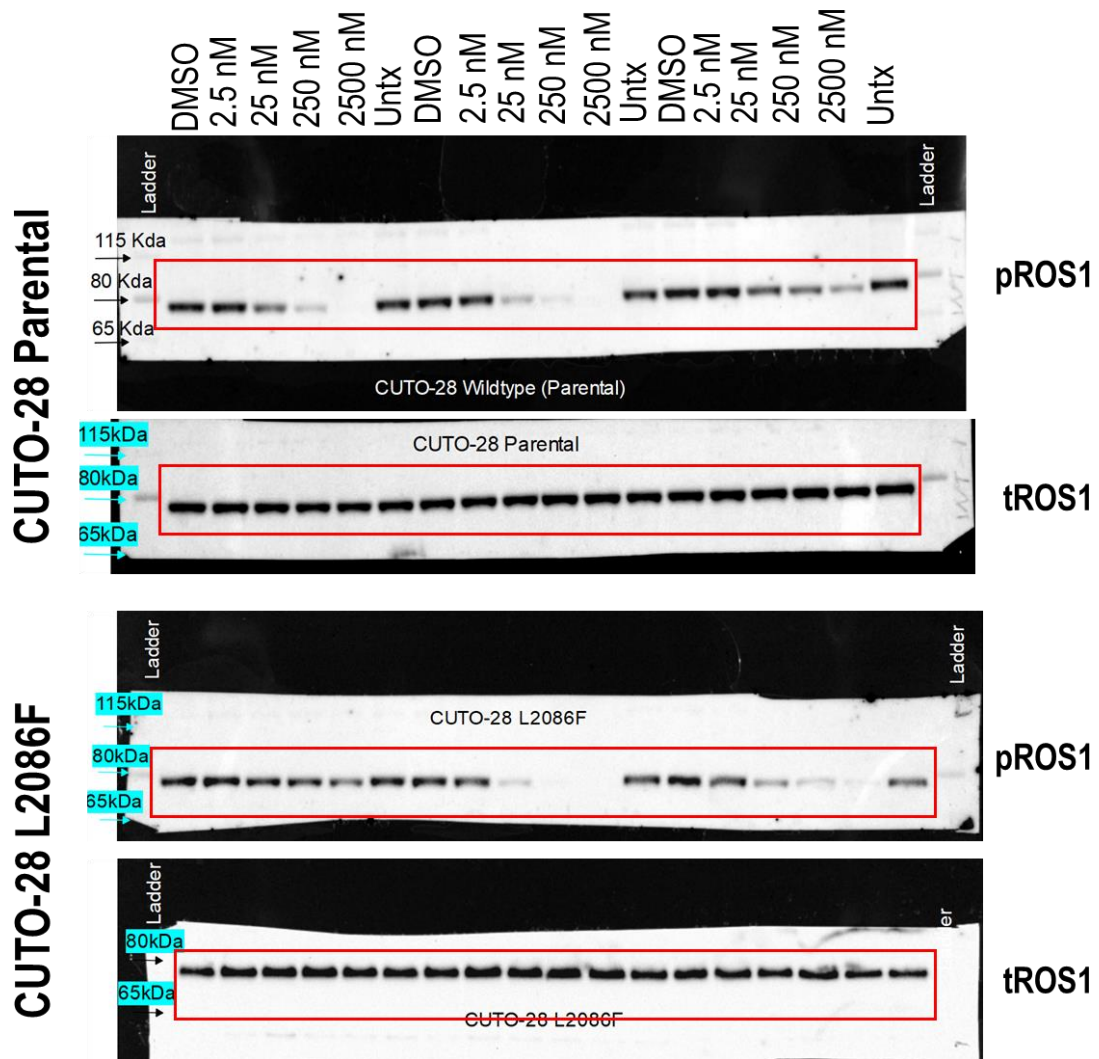

**Supplementary Figure 10c. Uncropped western blot from chemiluminescent images TKI-treated CUTO-28 Parental and CUTO-28 L2086F cell lysate blotting in Figure 2d.** The images shown below are merged composites of the chemiluminescent image and the colorimetric membrane image. These are shown as composites to clearly delineate the outline of the blot and depict protein ladders.

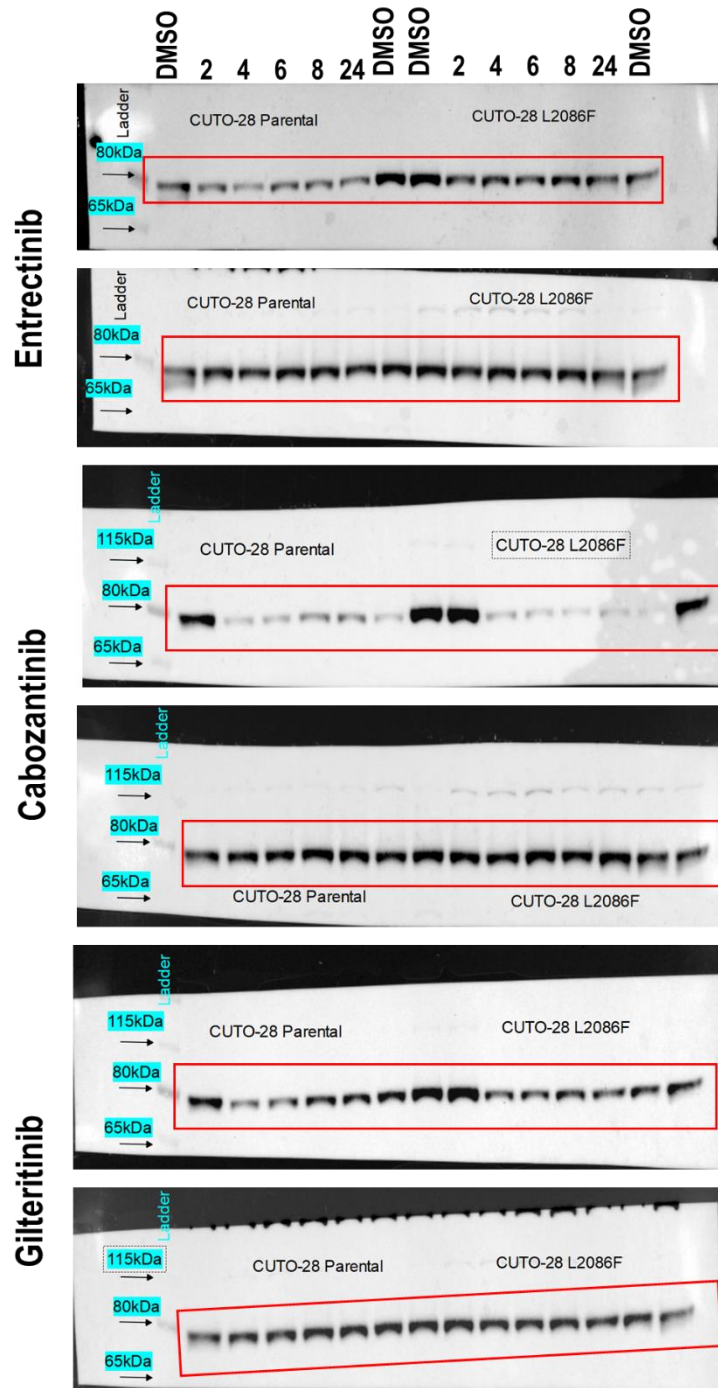

**Supplementary Figure 10d. Uncropped western blot chemiluminescent images from TKI-treated CUTO-28 Parental and CUTO-28 L2086F cell lysate blotting in Figure 2e.** The images shown below are merged composites of the chemiluminescent image and the colorimetric membrane image. These are shown as composites to clearly delineate the outline of the blot and depict protein ladders.

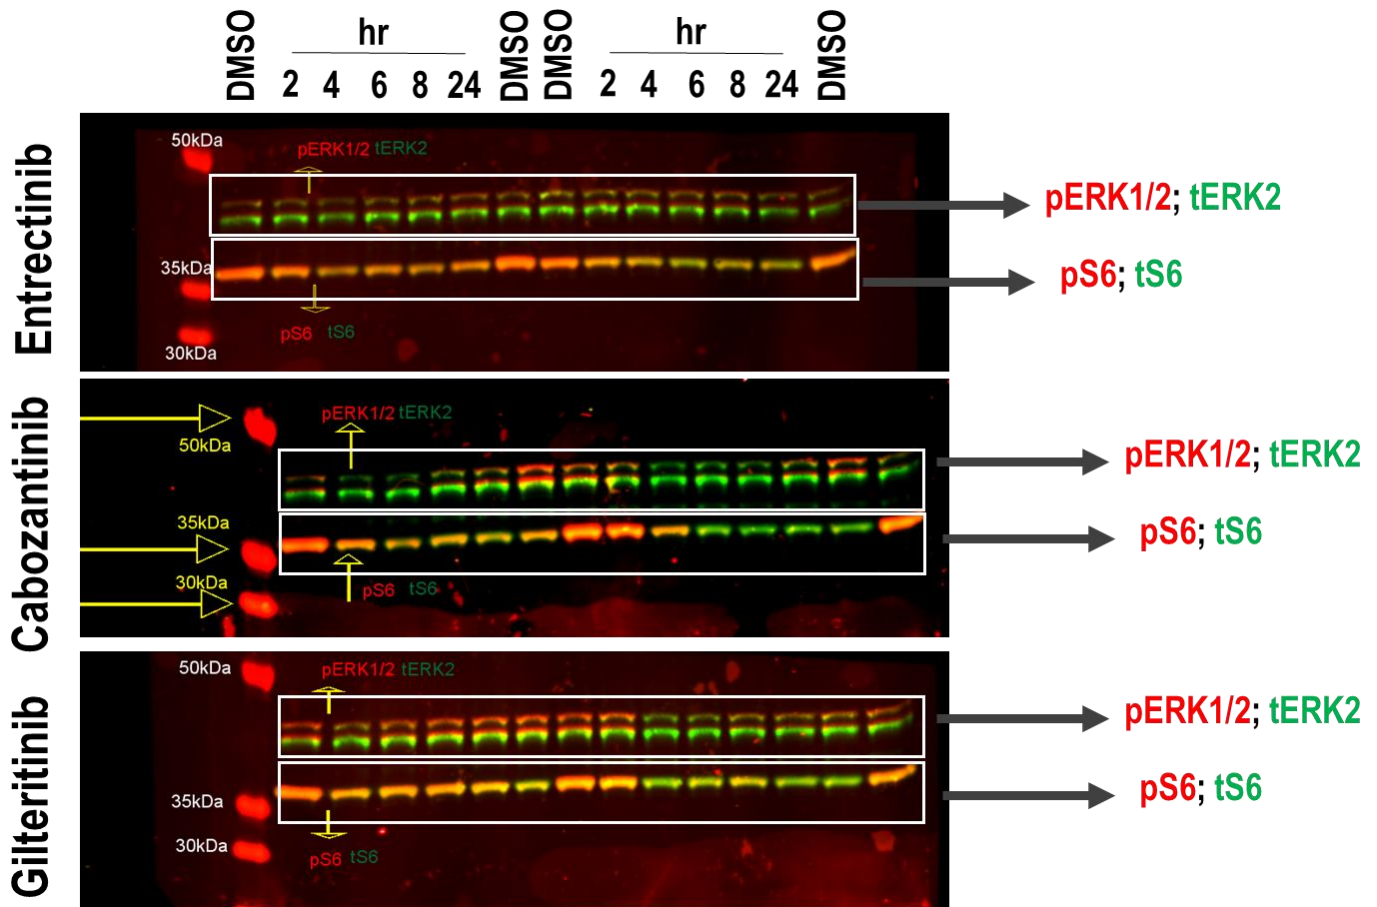

**Supplementary Figure 10e. Uncropped western blot chemiluminescent images TKI-treated CUTO-28 Parental and CUTO-28 L2086F cell lysate blotting in Supplementary Figure 6.** ERK and S6 signaling (phospho-ERK1/2 and total ERK2, phospho-S6 and total S6) were multiplexed via detection with Anti-Rabbit-Alexa680 and Anti-Mouse-Alexa790 secondary antibodies. Figure S6 shows the original black and white images from each respective channel separately. Composite red/green images from LI-COR imaging are shown below.

**Supplementary Table 1. Adverse events associated with cabozantinib, gilteritinib in the CELESTIAL and ADMIRAL clinical trials.** Heat map depicts a visual summary of the incidence of grade 3 or greater adverse events for cabozantinib and gilteritinib.

|                                                                     | <b>ADVERSE EVENTS OCCURRING IN <math>\geq</math>20% OF PATIENTS</b> | <b>INCIDENCE OF GRADE <math>\geq</math>3 ADVERSE EVENTS (%)</b> |
|---------------------------------------------------------------------|---------------------------------------------------------------------|-----------------------------------------------------------------|
| <b>CABOZANTINIB<br/>60 MG<br/><br/>CELESTIAL<br/>CLINICAL TRIAL</b> | Diarrhea                                                            | 10                                                              |
|                                                                     | Decreased appetite                                                  | 6                                                               |
|                                                                     | Palmar-plantar erythrodysesthesia                                   | 17                                                              |
|                                                                     | Fatigue                                                             | 10                                                              |
|                                                                     | Nausea                                                              | 2                                                               |
|                                                                     | Hypertension                                                        | 16                                                              |
|                                                                     | Vomiting                                                            | <1                                                              |
|                                                                     | Increased in aspartate aminotransferase level                       | 11                                                              |
|                                                                     | Asthenia                                                            | 7                                                               |
|                                                                     | Febrile neutropenia                                                 | 46                                                              |
|                                                                     | Anemia                                                              | 47                                                              |
|                                                                     | Pyrexia                                                             | 3                                                               |
|                                                                     | Increase in alanine aminotransferase level                          | 14                                                              |
|                                                                     | <b>GILTERITINIB<br/>120 MG<br/><br/>ADMIRAL CLINICAL<br/>TRIAL</b>  | Diarrhea                                                        |
| Increased in aspartate aminotransferase level                       |                                                                     | 15                                                              |
| Hypokalemia                                                         |                                                                     | 13                                                              |
| Constipation                                                        |                                                                     | 1                                                               |
| Platelet count decreased                                            |                                                                     | <1                                                              |
| Fatigue                                                             |                                                                     | 2.4                                                             |
| Cough                                                               |                                                                     | <1                                                              |
| Thrombocytopenia                                                    |                                                                     | 23                                                              |
| Headache                                                            |                                                                     | 1                                                               |
| Peripheral edema                                                    |                                                                     | <1                                                              |
| Vomiting                                                            |                                                                     | <1                                                              |
| Dyspnea                                                             |                                                                     | 4                                                               |
| Blood alkaline phosphatase increased                                |                                                                     | 3                                                               |
| <b>CRIZOTINIB<br/>250 MG BID<br/><br/>NCT00932893</b>               |                                                                     | Nausea                                                          |
|                                                                     | Vomiting                                                            | 1                                                               |
|                                                                     | Constipation                                                        | 2                                                               |
|                                                                     | Increase in aminotransferase                                        | 16                                                              |
|                                                                     | Fatigue                                                             | 2                                                               |
|                                                                     | Dizziness                                                           | 1                                                               |



**Supplementary Table 1. (Contd.)**

**Incidence of Grade  $\geq$  3 Adverse Events (% indicated in heat map cell)**

|                                   | <b>Cabozantinib</b> | <b>Gilteritinib</b> | <b>Crizotinib</b> |
|-----------------------------------|---------------------|---------------------|-------------------|
| Palmar plantar erythrodysesthesia | 17                  | 0                   | 0                 |
| Hypertension                      | 16                  | 0                   | 0                 |
| Increased in AST/ALT              | 11                  | 15                  | 16                |
| Diarrhea                          | 10                  | 4                   | 0                 |
| Fatigue                           | 10                  | 2                   | 2                 |
| Asthenia                          | 7                   | 0                   | 0                 |
| Decreased appetite                | 6                   | 0                   | 0                 |
| Nausea                            | 2                   | 0                   | 1                 |
| Constipation                      | 1                   | 1                   | 0                 |
| Vomiting                          | 1                   | 1                   | 1                 |
| Febrile Neutropenia               | 0                   | 46                  | 0                 |
| Anemia                            | 0                   | 47                  | 0                 |
| Hypokalemia                       | 0                   | 13                  | 0                 |
| Thrombocytopenia                  | 0                   | 23                  | 0                 |
| Headache                          | 0                   | 1                   | 0                 |
| Peripheral edema                  | 0                   | 1                   | 0                 |
| Dyspnea                           | 0                   | 4                   | 0                 |
| Blood AlkPhos increased           | 0                   | 3                   | 0                 |
| Dizziness                         | 0                   | 0                   | 1                 |

**Unique Adverse Events Summary**

**Cabozantinib:** Decreased appetite, palmar-plantar erythrodysesthesia, hypertension, and asthenia.

**Gilteritinib:** Febrile neutropenia, anemia, and thrombocytopenia.

**Crizotinib:** Dizziness

**Supplementary Table 2.** Primer sequences used to support polymerase chain reaction, site directed mutagenesis and CRISPR/Cas9 genome editing experiments.

| <b>Primer Name</b>  | <b>Primer Sequence (all indicated 5' - 3')</b>                                                                                                                                |
|---------------------|-------------------------------------------------------------------------------------------------------------------------------------------------------------------------------|
| ROS1 F2004C S       | GGCACATCTGATGAGCAAATGTAATCATCCCAACATTCTG                                                                                                                                      |
| ROS1 F2004C AS      | CAGAATGTTGGGATGATTACATTTGCTCATCAGATGTGCC                                                                                                                                      |
| ROS1 L2026M F       | CCTCCATCAGTTCCATGATAATGTATTGGGGTTCATTCA                                                                                                                                       |
| ROS1 L2026M R       | TGAATGAACCCCAATACATTATCATGGAAGTATGGAAGG                                                                                                                                       |
| ROS1 G2032R AS      | AATAAGTAAGAAGGTCTCTCCCTCCATCAGTTCCAG                                                                                                                                          |
| ROS1 G2032R S       | CTGGAAGTATGAGAGGAGACCTTCTTACTTATT                                                                                                                                             |
| L2086F_REV          | AGTCTTTCACGGAAACAAAGCAATTTCTAGCTGCCAG                                                                                                                                         |
| L2086F_FWD          | CTGGCAGCTAGAAATTGCTTTGTTCCGTGAAAGACT                                                                                                                                          |
| L2086FguideF        | caccgTATAGTCTTTCACGGAAACA                                                                                                                                                     |
| L2086FguideR        | aaacTGTTTCCGTGAAAGACTATAc                                                                                                                                                     |
| L2086seqF           | taatgcaggcagggcttaa                                                                                                                                                           |
| L2086seqR           | tgctgagaccaggaatagta                                                                                                                                                          |
| ROS1 F10            | AGAAGGGTCCACAGACCAG                                                                                                                                                           |
| ROS1 R13            | TCCAGTCTCCCTCCTGTTTG                                                                                                                                                          |
| L2086F HDR template | ATTTCTGGAAGTtattgtgttattattattattattaAATATAACTTCTGCCA<br>CAGGGATCTGGCAGCTAGAAATTGctTTGTTTCCGTGAAAGACTAT<br>ACCAGTCCACGGATAGTGAAGATTGGAGACTTTGGACTCGCCAGA<br>GACATCTATAAAAATGA |
